# Supplementary material
Source: PubMed Central journal article supplement (PMC1794400)

**Figure S1**

**A**

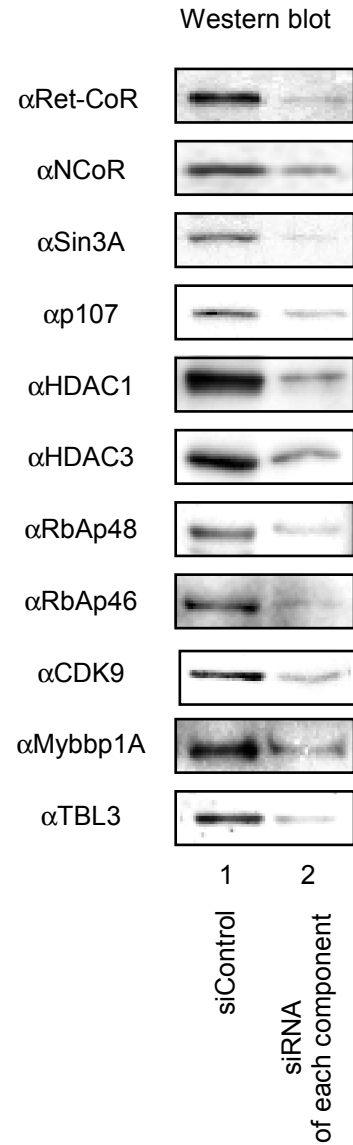

**B**

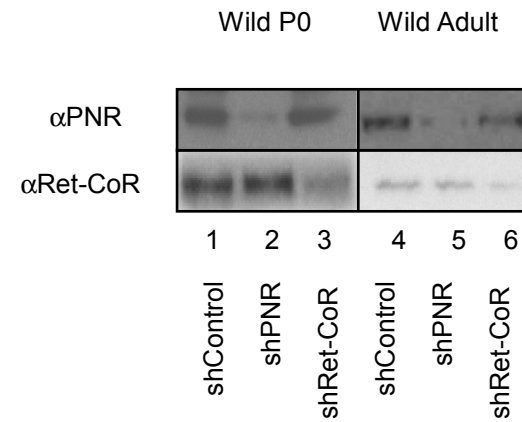

**C**

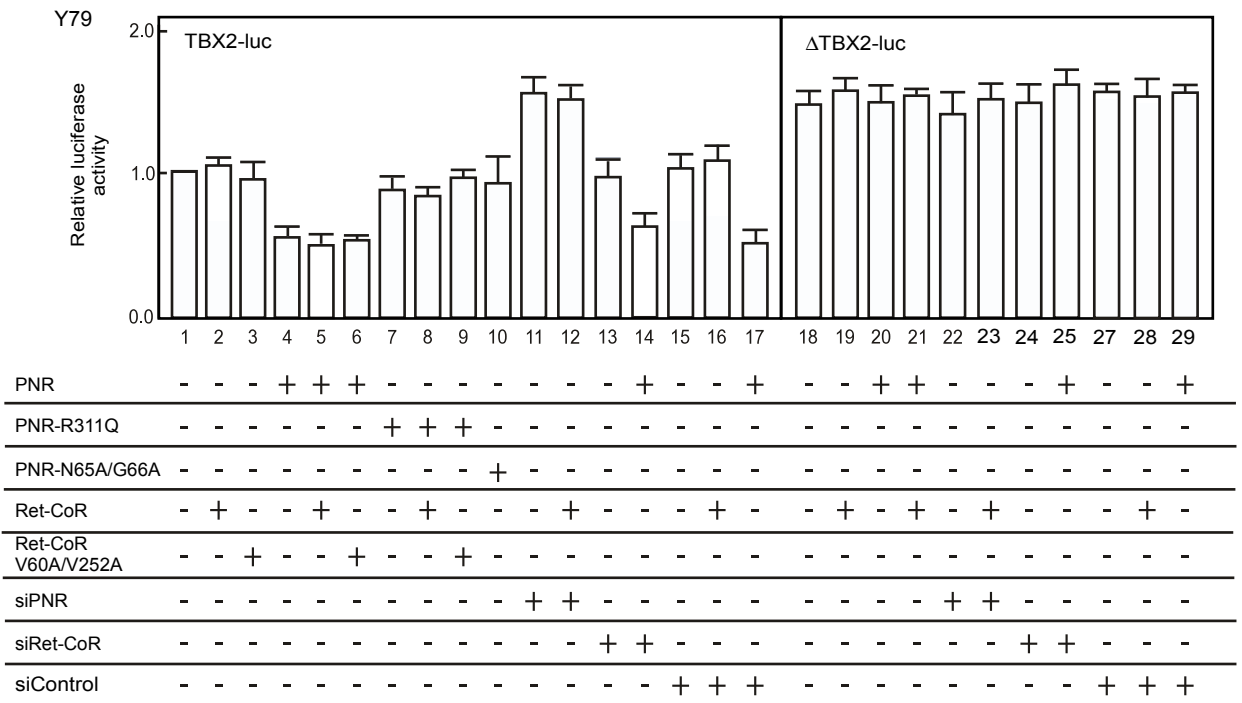

Supplement: 7601548s2.pdf [file 7601548s2.pdf]
